# Supplementary material for: 2,2-Diphenethyl Isothiocyanate Enhances Topoisomerase Inhibitor-Induced Cell Death and Suppresses Multi-Drug Resistance 1 in Breast Cancer Cells
Source: MDPI journal article supplement (doi:10.3390/cancers15030928), 2023-02-01
Supplement: s1 [file s1]

Supplementary Materials

# 2,2-Diphenethyl Isothiocyanate Enhances Topoisomerase Inhibitor-Induced Cell Death and Suppresses Multi-Drug Resistance 1 in Breast Cancer Cells

Monika Aggarwal

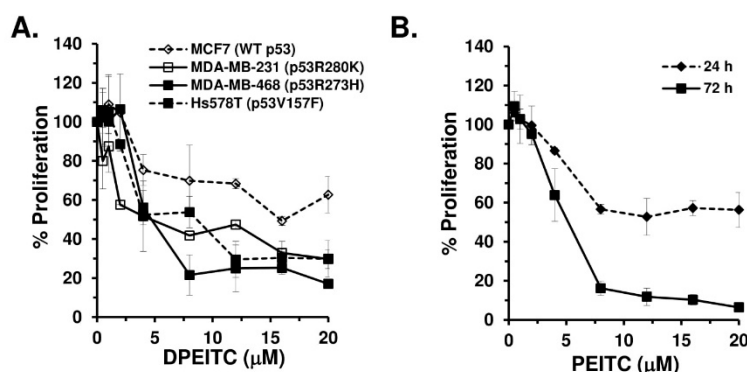

**Figure S1.** Effects of DPEITC on the proliferation of TNBC cell lines expressing WT p53 or mutant p53. **(A)** MCF7 (WT p53), MDA-MB-231 (p53<sup>R280K</sup>), MDA-MB-468 (p53<sup>R273H</sup>), and Hs578T (p53<sup>V157F</sup>) cells were treated with DMSO or DPEITC for 24 h. Percent cell proliferation was determined by the WST-1 assay. **(B)** Hs578T (p53<sup>V157F</sup>) cells were treated with DMSO or PEITC for 24 h or 72 h. Percent cell proliferation was determined by the WST-1 assay. Experiment were performed in triplicate. Error bars represents SD.

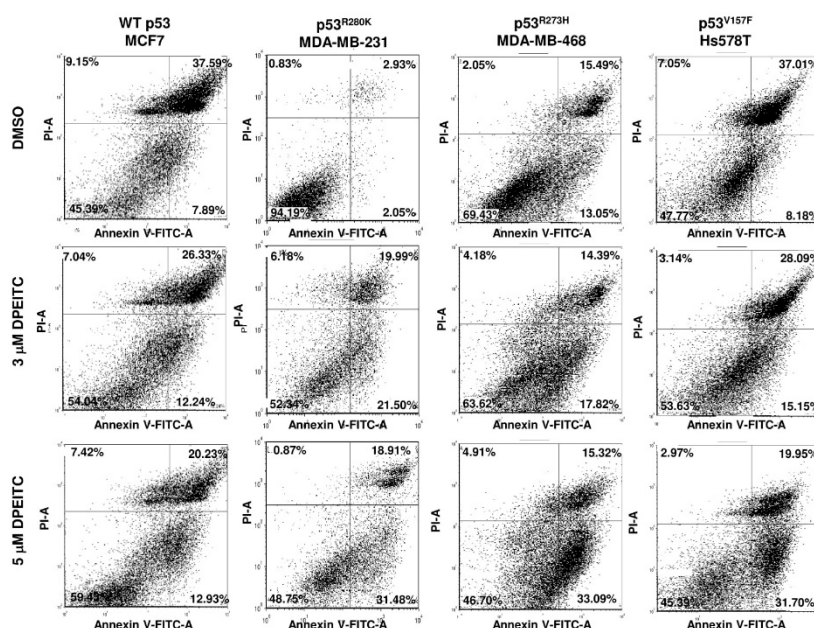

**Figure S2.** DPEITC induces apoptosis in TNBC cell lines with mutated p53. MCF7 (WT p53), MDA-MB-231 (p53<sup>R280K</sup>), MDA-MB-468 (p53<sup>R273H</sup>), and Hs578T (p53<sup>V157F</sup>) cells were treated with DMSO or DPEITC for 72 h and analyzed for apoptosis. Representative flow cytometry images are shown.

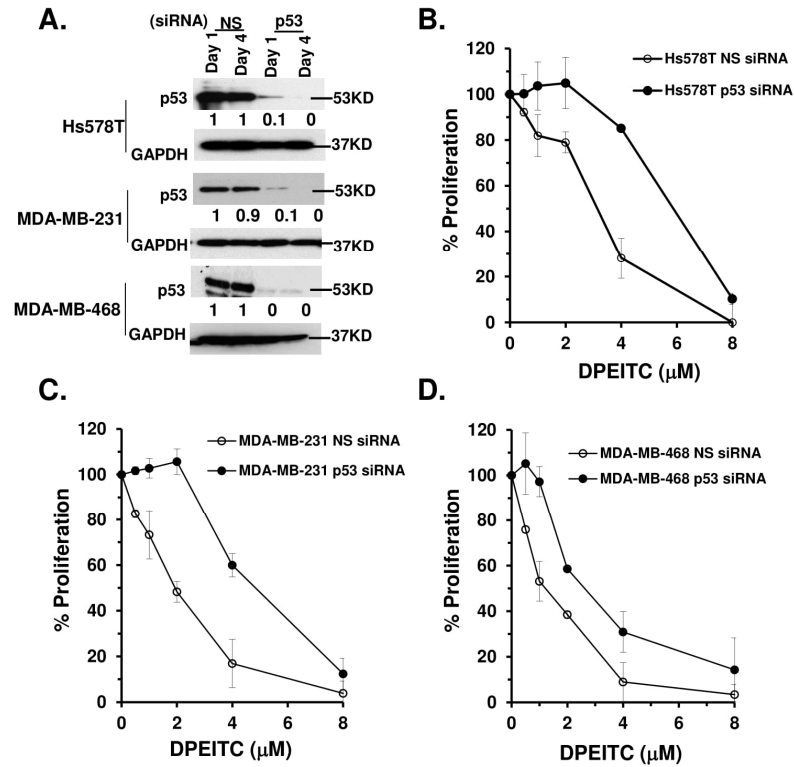

**Figure S3.** DPEITC inhibits cell proliferation in a mutant p53-specific manner in TNBC cell lines. (A) Cell lysates of MDA-MB-231 (p53<sup>R280K</sup>), MDA-MB-468 (p53<sup>R273H</sup>), and Hs578T (p53<sup>V157F</sup>) transfected with NS siRNA or p53 siRNA were analyzed by western blotting. NS siRNA or p53 siRNA transfected Hs578T (B), MDA-MB-231 (C), and MDA-MB-468 (D) cells were treated with DMSO or DPEITC for 72 h. Percent cell proliferation was determined by the WST-1 assay. Experiment were performed in triplicate. Error bars represents SD.

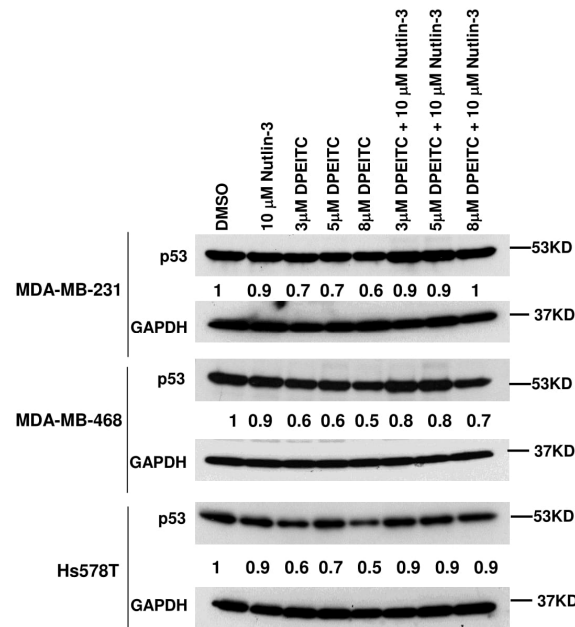

**Figure S4.** DPEITC sensitizes p53 mutants to proteasomal degradation. MDA-MB-231, MDA-MB-468, and Hs578T cells were treated DPEITC (3, 5, or 8  $\mu$ M), Nutlin-3 (10  $\mu$ M), or both for 4 h. Cells were harvested and lysates were prepared. Lysate fractions were resolved by SDS-PAGE and probed with p53 DO-1 antibody. Experiment were performed in triplicate.

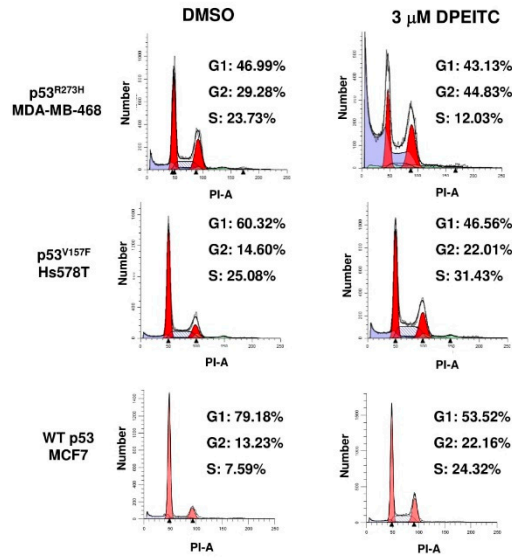

**Figure S5.** DPEITC induces a cell cycle delay in breast cancer cell lines. MCF7 (WT p53), MDA-MB-468 (p53<sup>R273H</sup>), and Hs578T (p53<sup>V157F</sup>) cells were treated with DMSO or 3 μM DPEITC for 72 h and analyzed by flow cytometry. Representative cell cycle analysis images are shown.

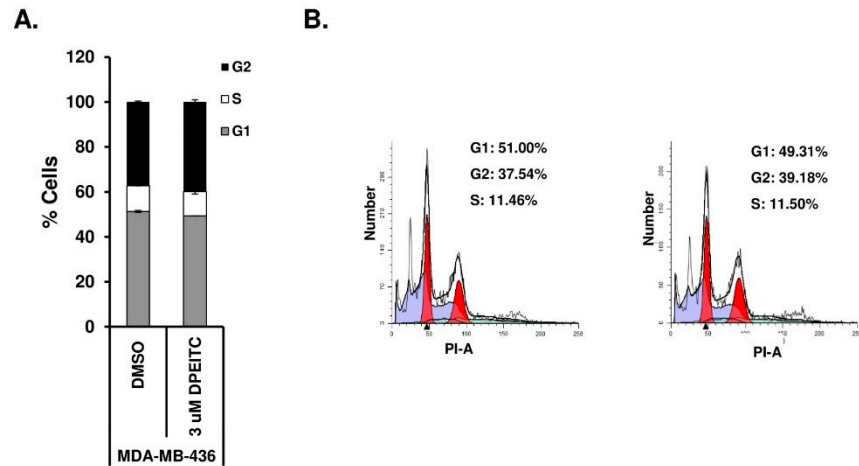

**Figure S6.** Effects of DPEITC on cell cycle progression in p53 null MDA-MB-436 TNBC cell line. (A) p53 null MDA-MB-436 cells were treated with DMSO or 3 μM DPEITC for 72 h and analyzed by flow cytometry. Experiment were performed in triplicate. Error bars represents SD. (B) Representative cell cycle images are shown.

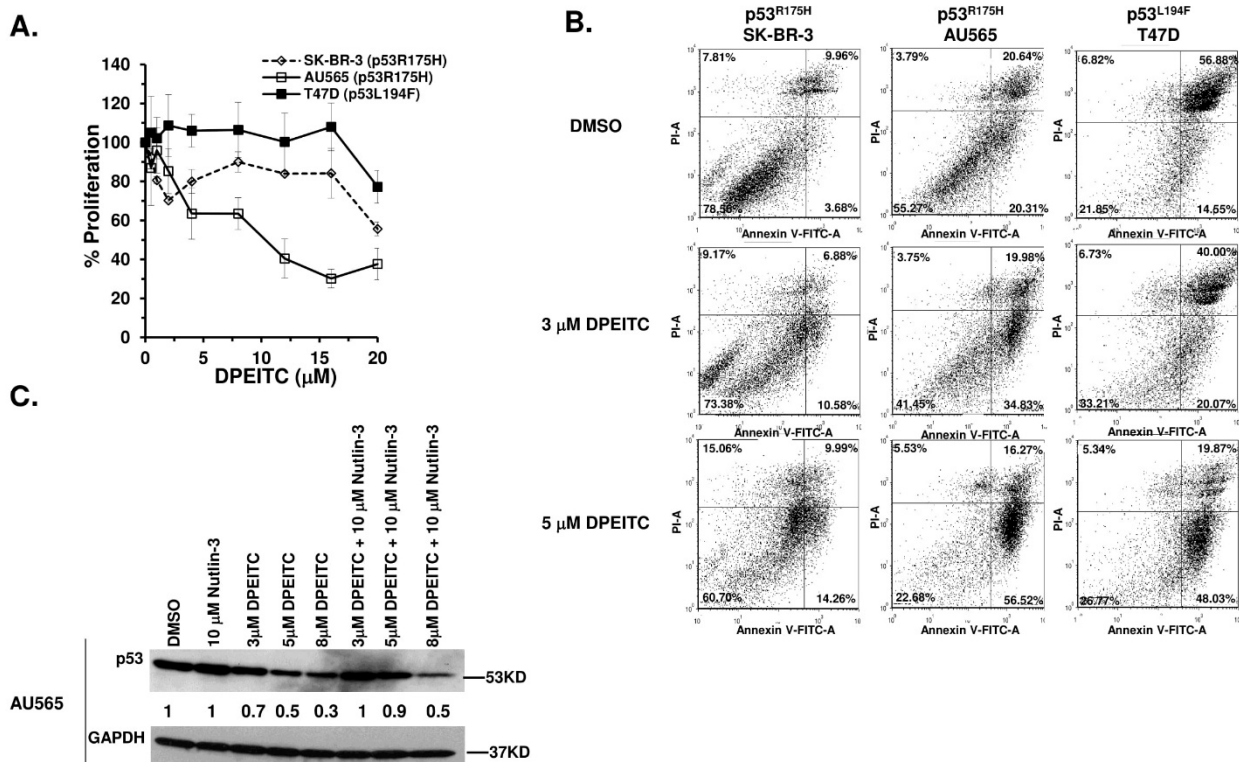

**Figure S7.** Effects of DPEITC on the proliferation, apoptosis, and mutant p53 expression levels in HER2+ and Luminal A breast cancer cell lines. (A) HER2+ SK-BR-3 (p53<sup>R175H</sup>) and AU565 (p53<sup>R175H</sup>), and Luminal A T47D (p53<sup>L194F</sup>) cell lines were treated with DMSO or DPEITC for 24 h. Percent cell proliferation was determined by the WST-1 assay. (B) HER2+ SK-BR-3 (p53<sup>R175H</sup>) and AU565 (p53<sup>R175H</sup>), and Luminal A T47D (p53<sup>L194F</sup>) cell lines were treated with DMSO or DPEITC for 72 h and analyzed for apoptosis. (C) AU565 (p53<sup>R175H</sup>) were treated DPEITC (3, 5, or 8  $\mu$ M), Nutlin-3 (10  $\mu$ M), or both for 4 h. Cells were harvested and lysates were prepared. Lysate fractions were resolved by SDS-PAGE and probed with p53 DO-1 antibody. Experiment were performed in triplicate. Error bars represents SD.

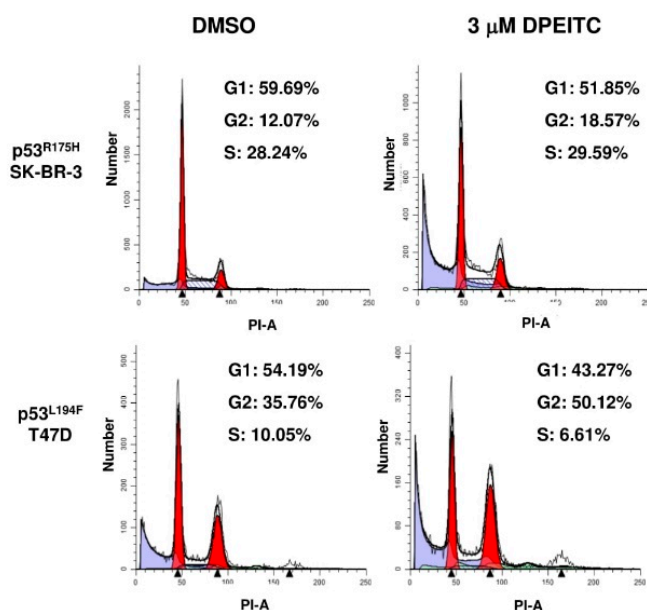

**Figure S8.** DPEITC induces a cell cycle delay in HER2+ and Luminal A breast cancer cell lines. SK-BR-3 (p53<sup>R175H</sup>) and Luminal A T47D (p53<sup>L194F</sup>) cells were treated with DMSO or 3  $\mu$ M DPEITC for 72 h and analyzed by flow cytometry. Representative cell cycle analysis images are shown.

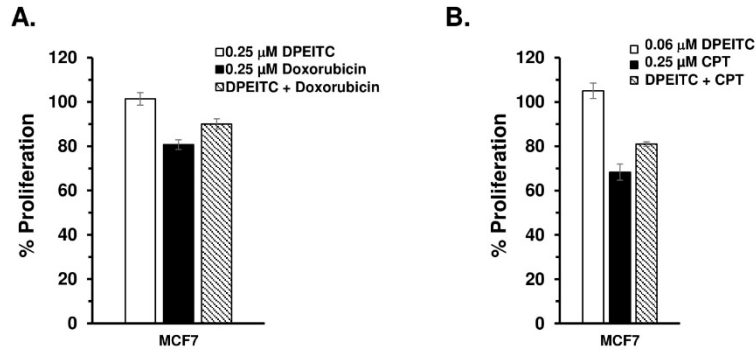

**Figure S9.** Effects of DPEITC and topoisomerase inhibitor co-treatment on WT p53 MCF7 cell proliferation. (A) WT p53 MCF7 cells were treated with DPEITC, doxorubicin, or both for 24 h. (B) WT p53 MCF7 cells were treated with DPEITC, CPT, or both for 24 h. Percent cell proliferation was determined by the WST-1 assay. Experiment were performed in triplicate. Error bars represents SD.

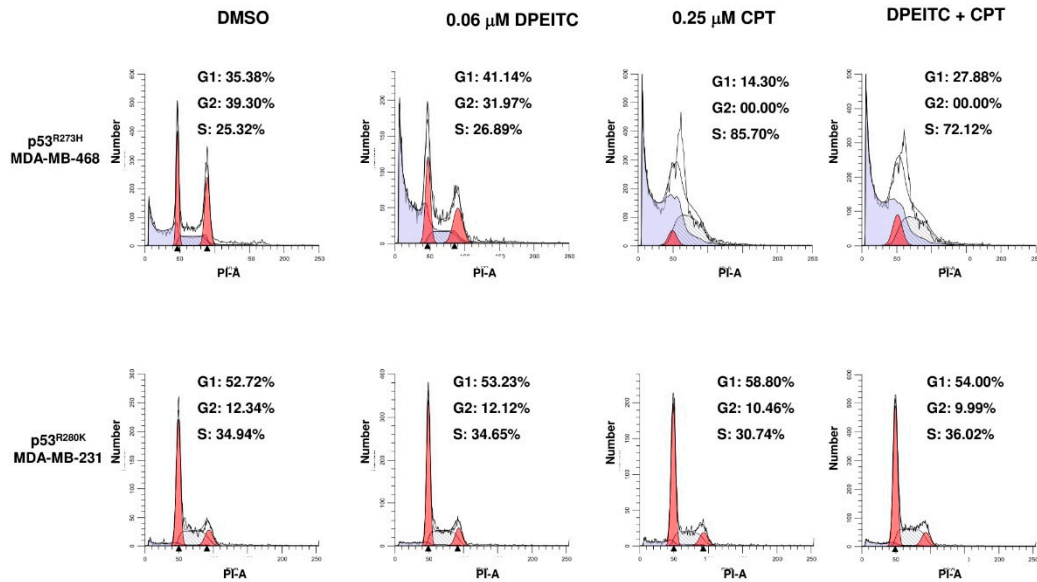

**Figure S10.** Effects of DPEITC and CPT co-treatment on cell cycle progression in p53 mutant TNBC cell lines. MDA-MB-468 (p53<sup>R273H</sup>) and MDA-MB-231 (p53<sup>R280K</sup>) cells were treated with DMSO, 0.06  $\mu$ M DPEITC, 0.25  $\mu$ M CPT, or both for 24 h and analyzed by flow cytometry. Representative cell cycle analysis images are shown.
