# Supplementary material for: 2,2-Diphenethyl Isothiocyanate Enhances Topoisomerase Inhibitor-Induced Cell Death and Suppresses Multi-Drug Resistance 1 in Breast Cancer Cells
Source: MDPI journal article supplement (doi:10.3390/cancers15030928), 2023-02-01
Supplement: s1 [file s1]

**C.**

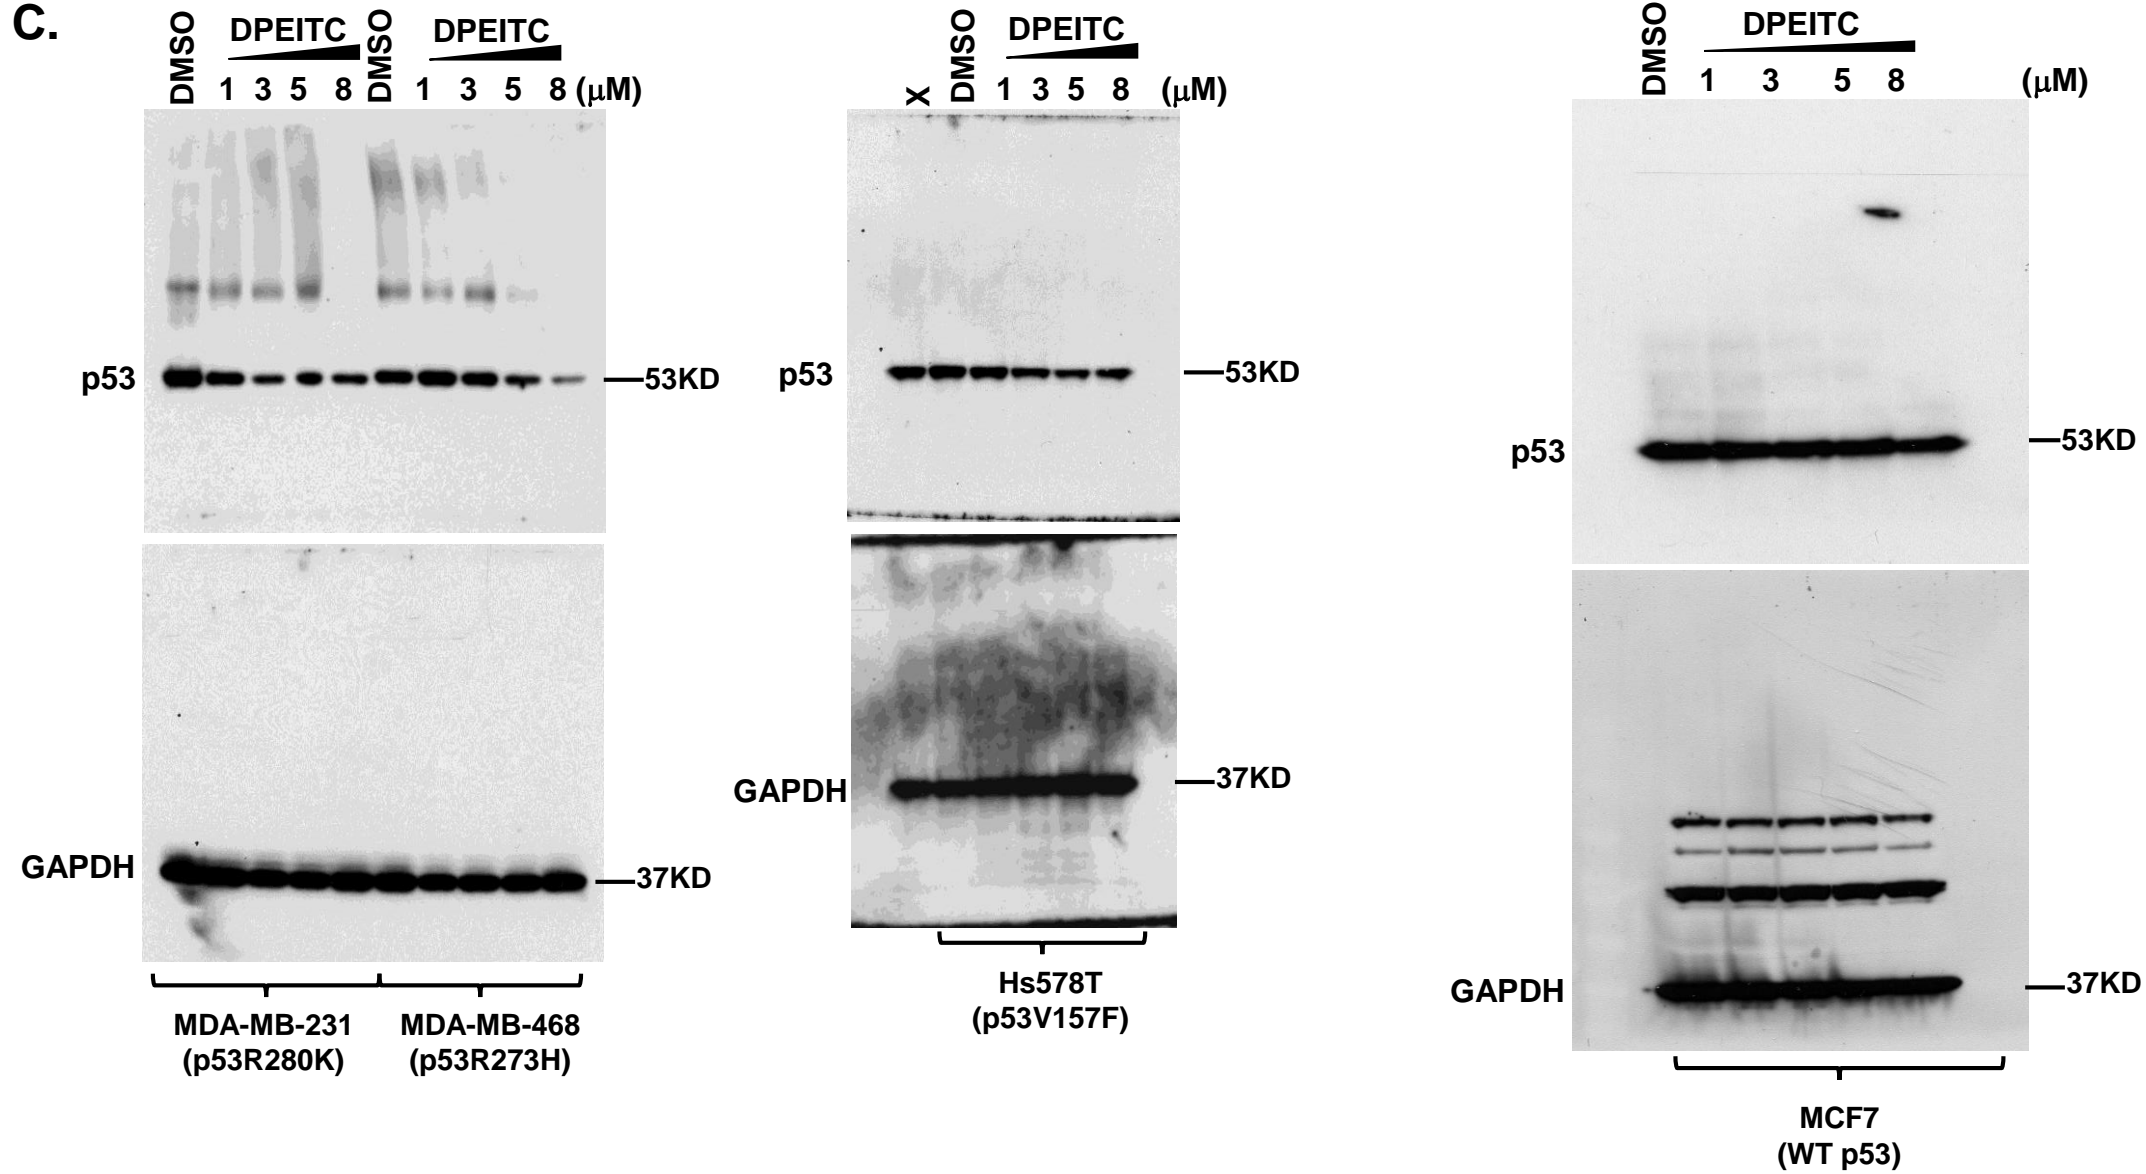

**Figure 1**

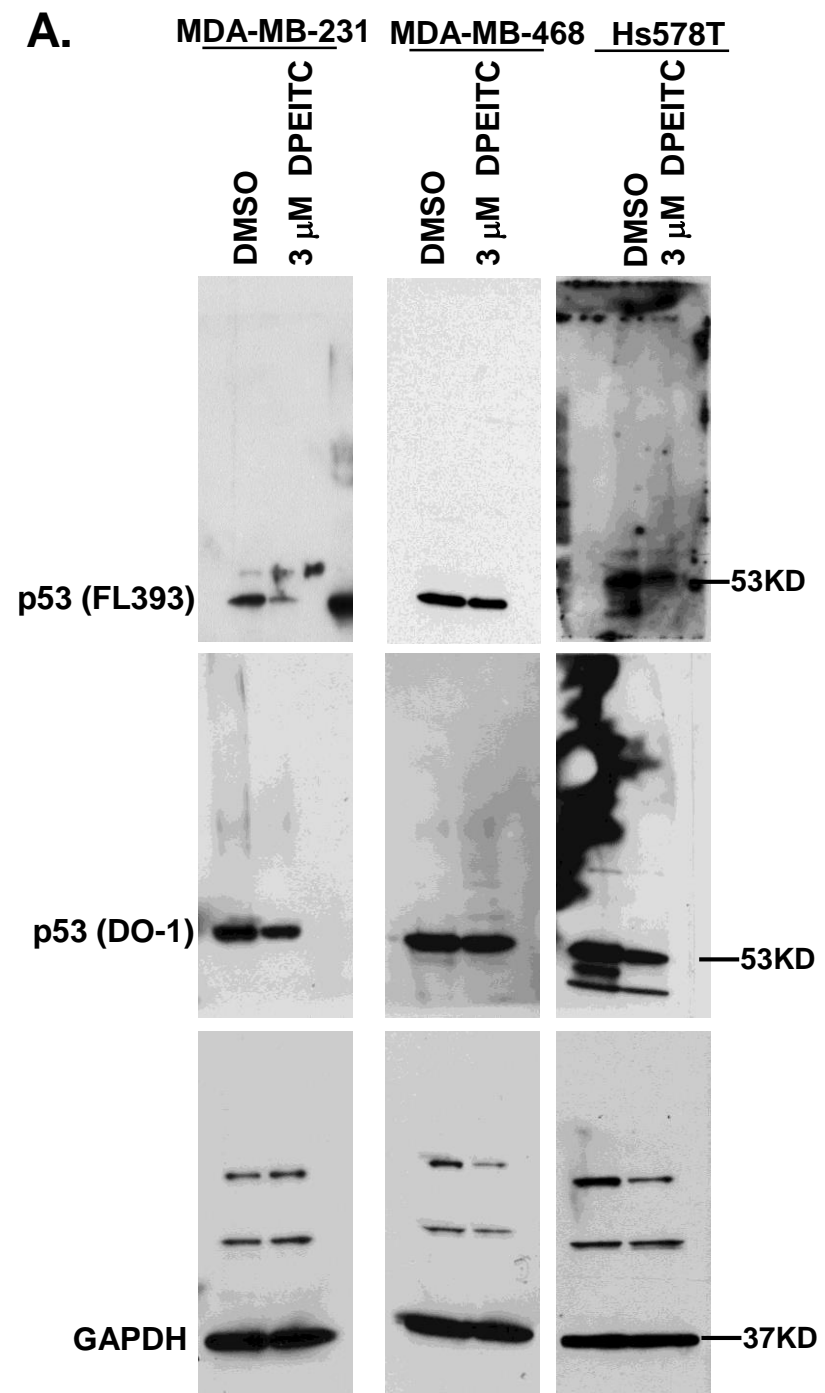

**Figure 2**

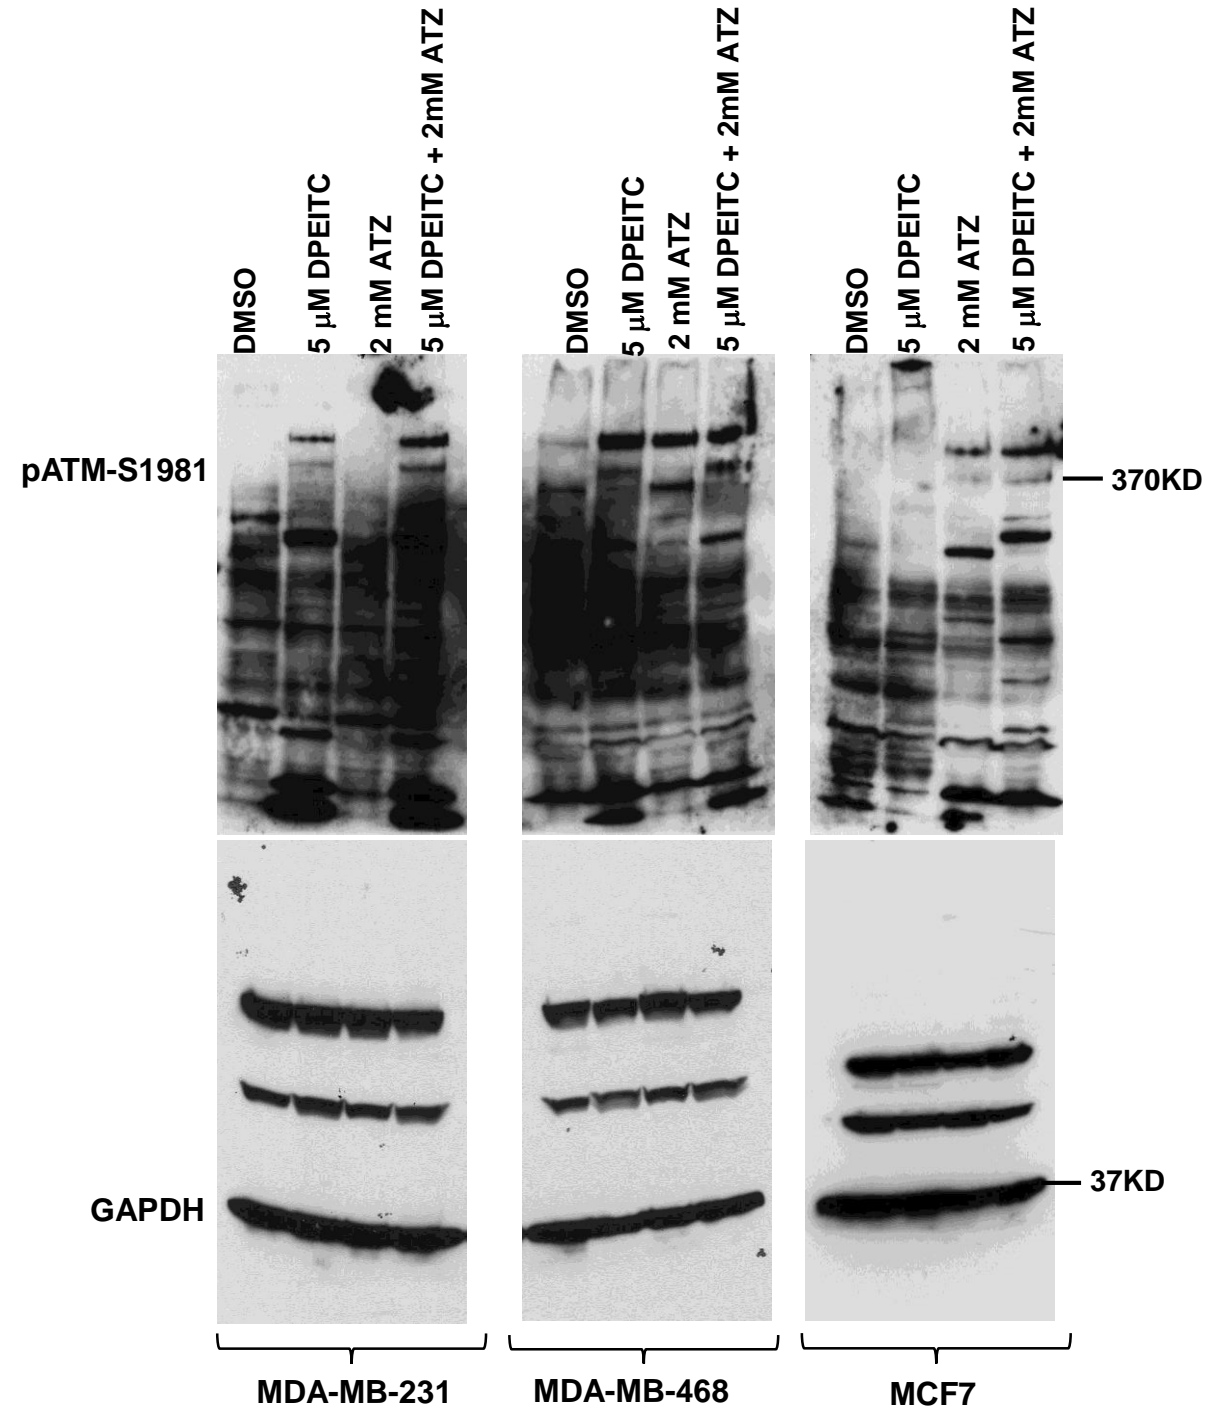

Figure 4

C.

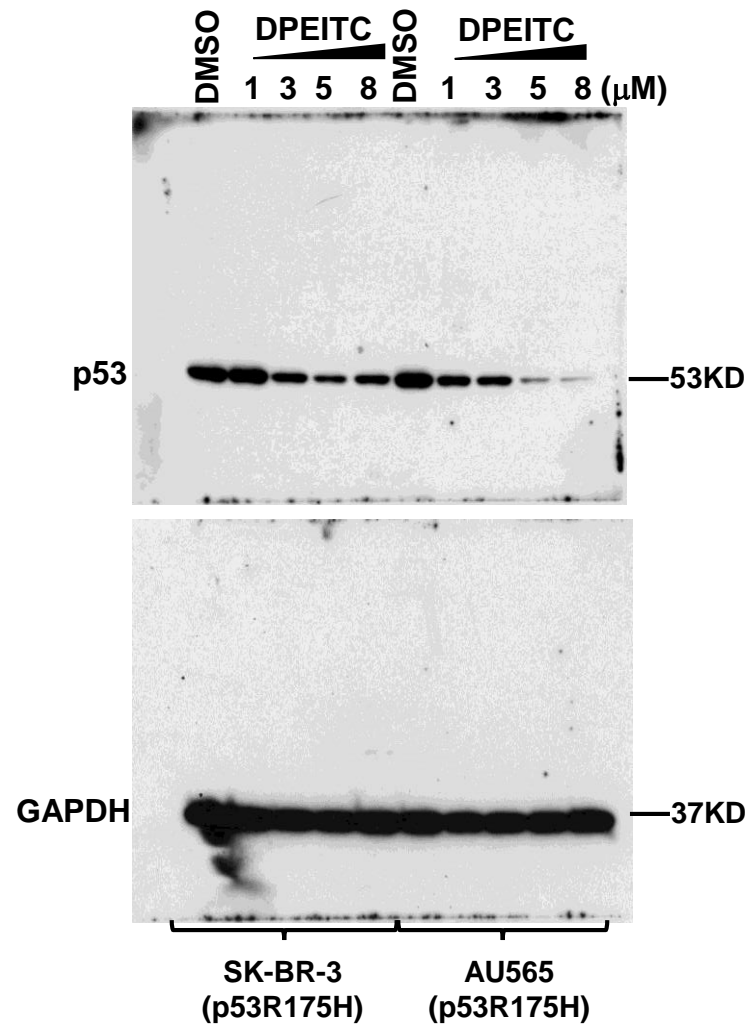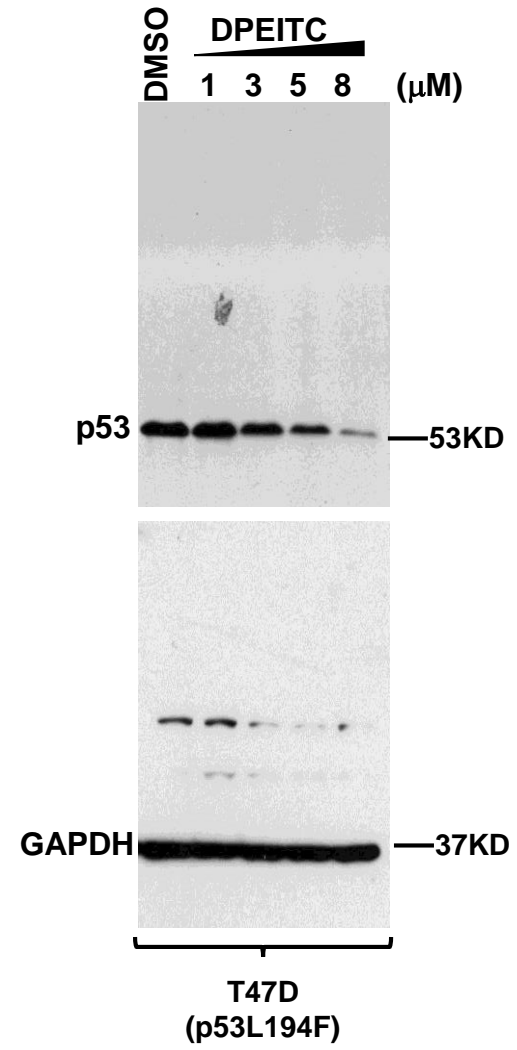

Figure 5

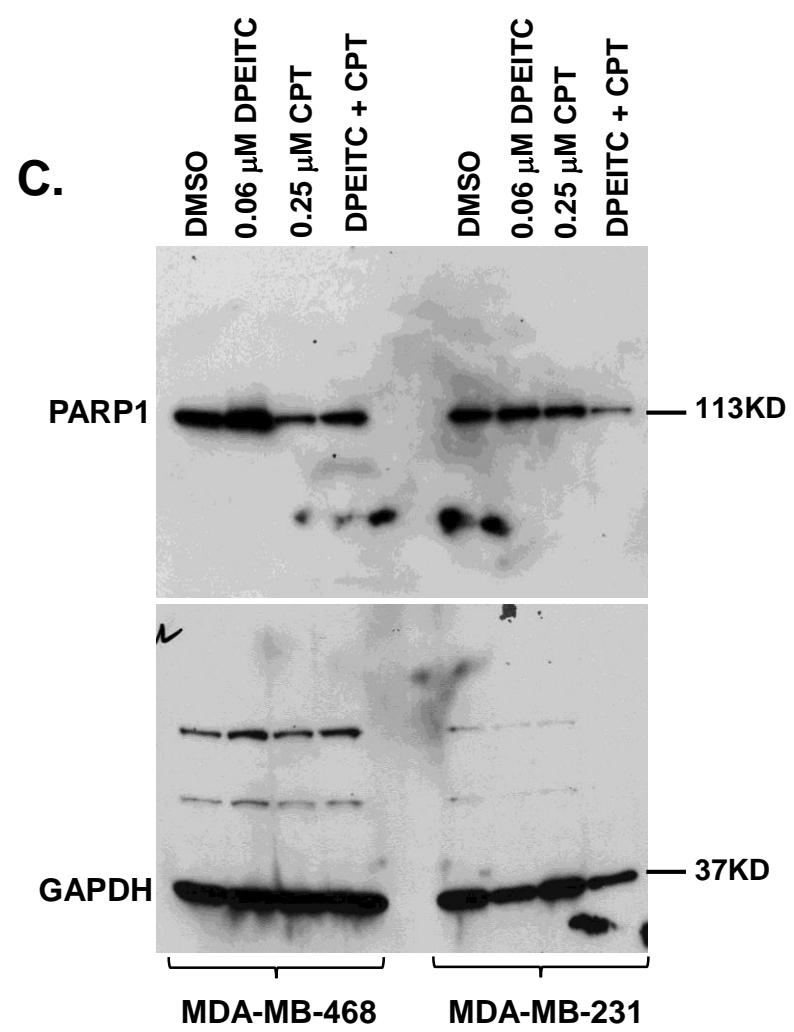

**Figure 7**

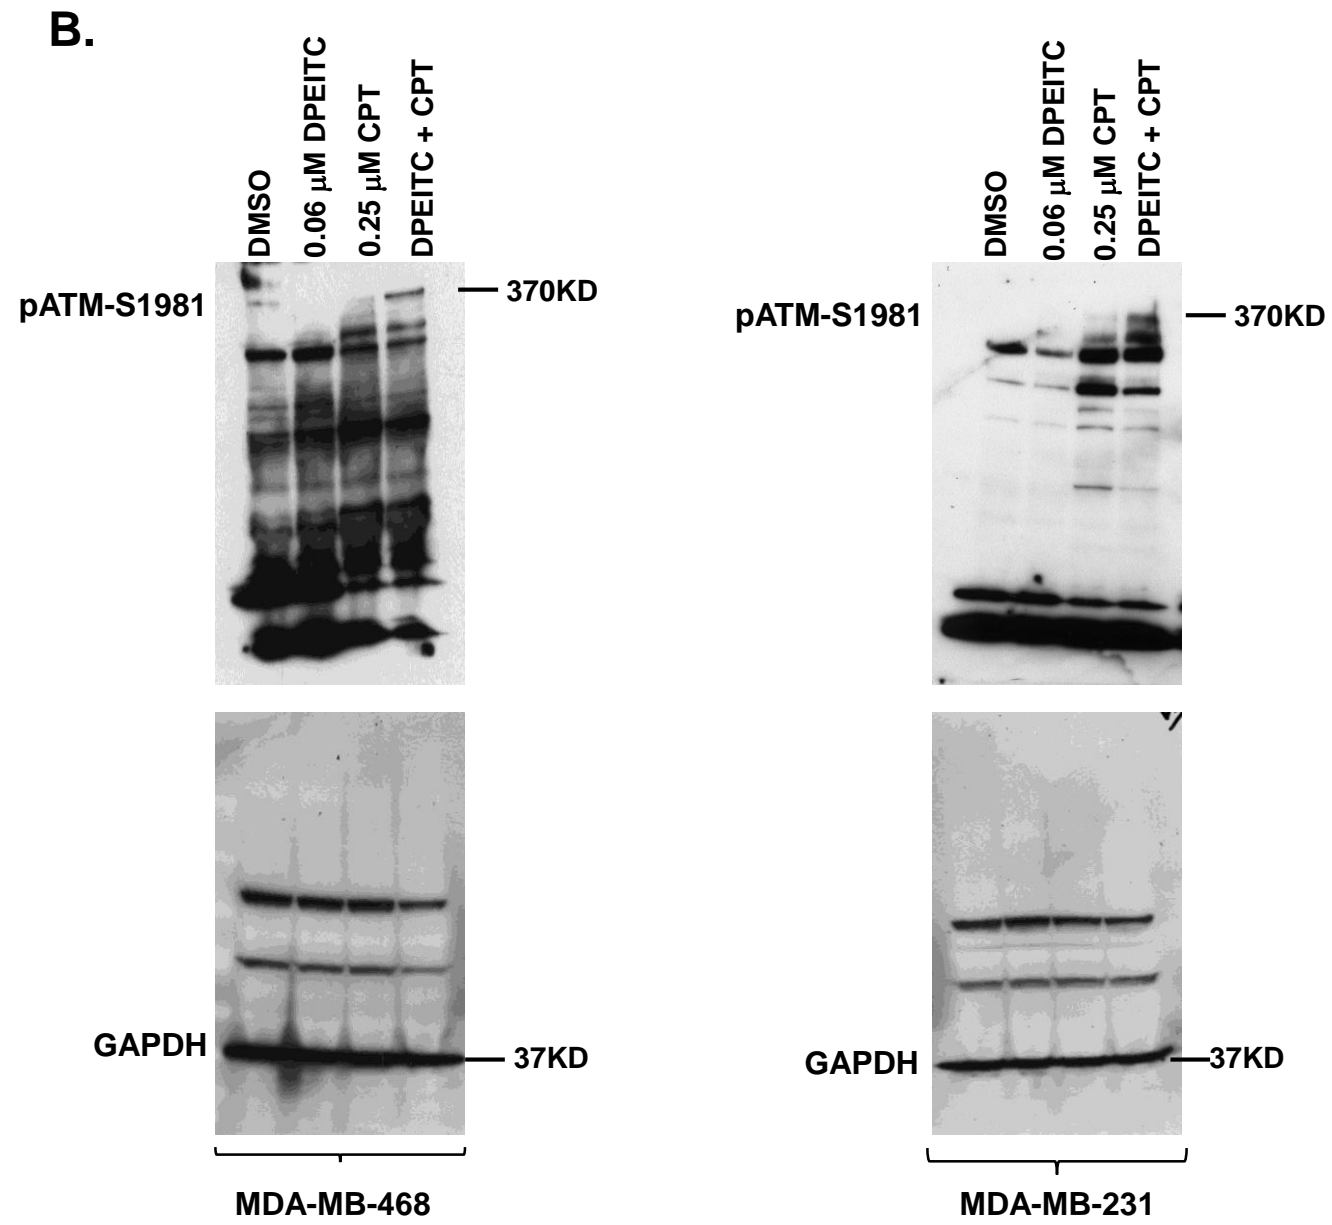

**Figure 8**

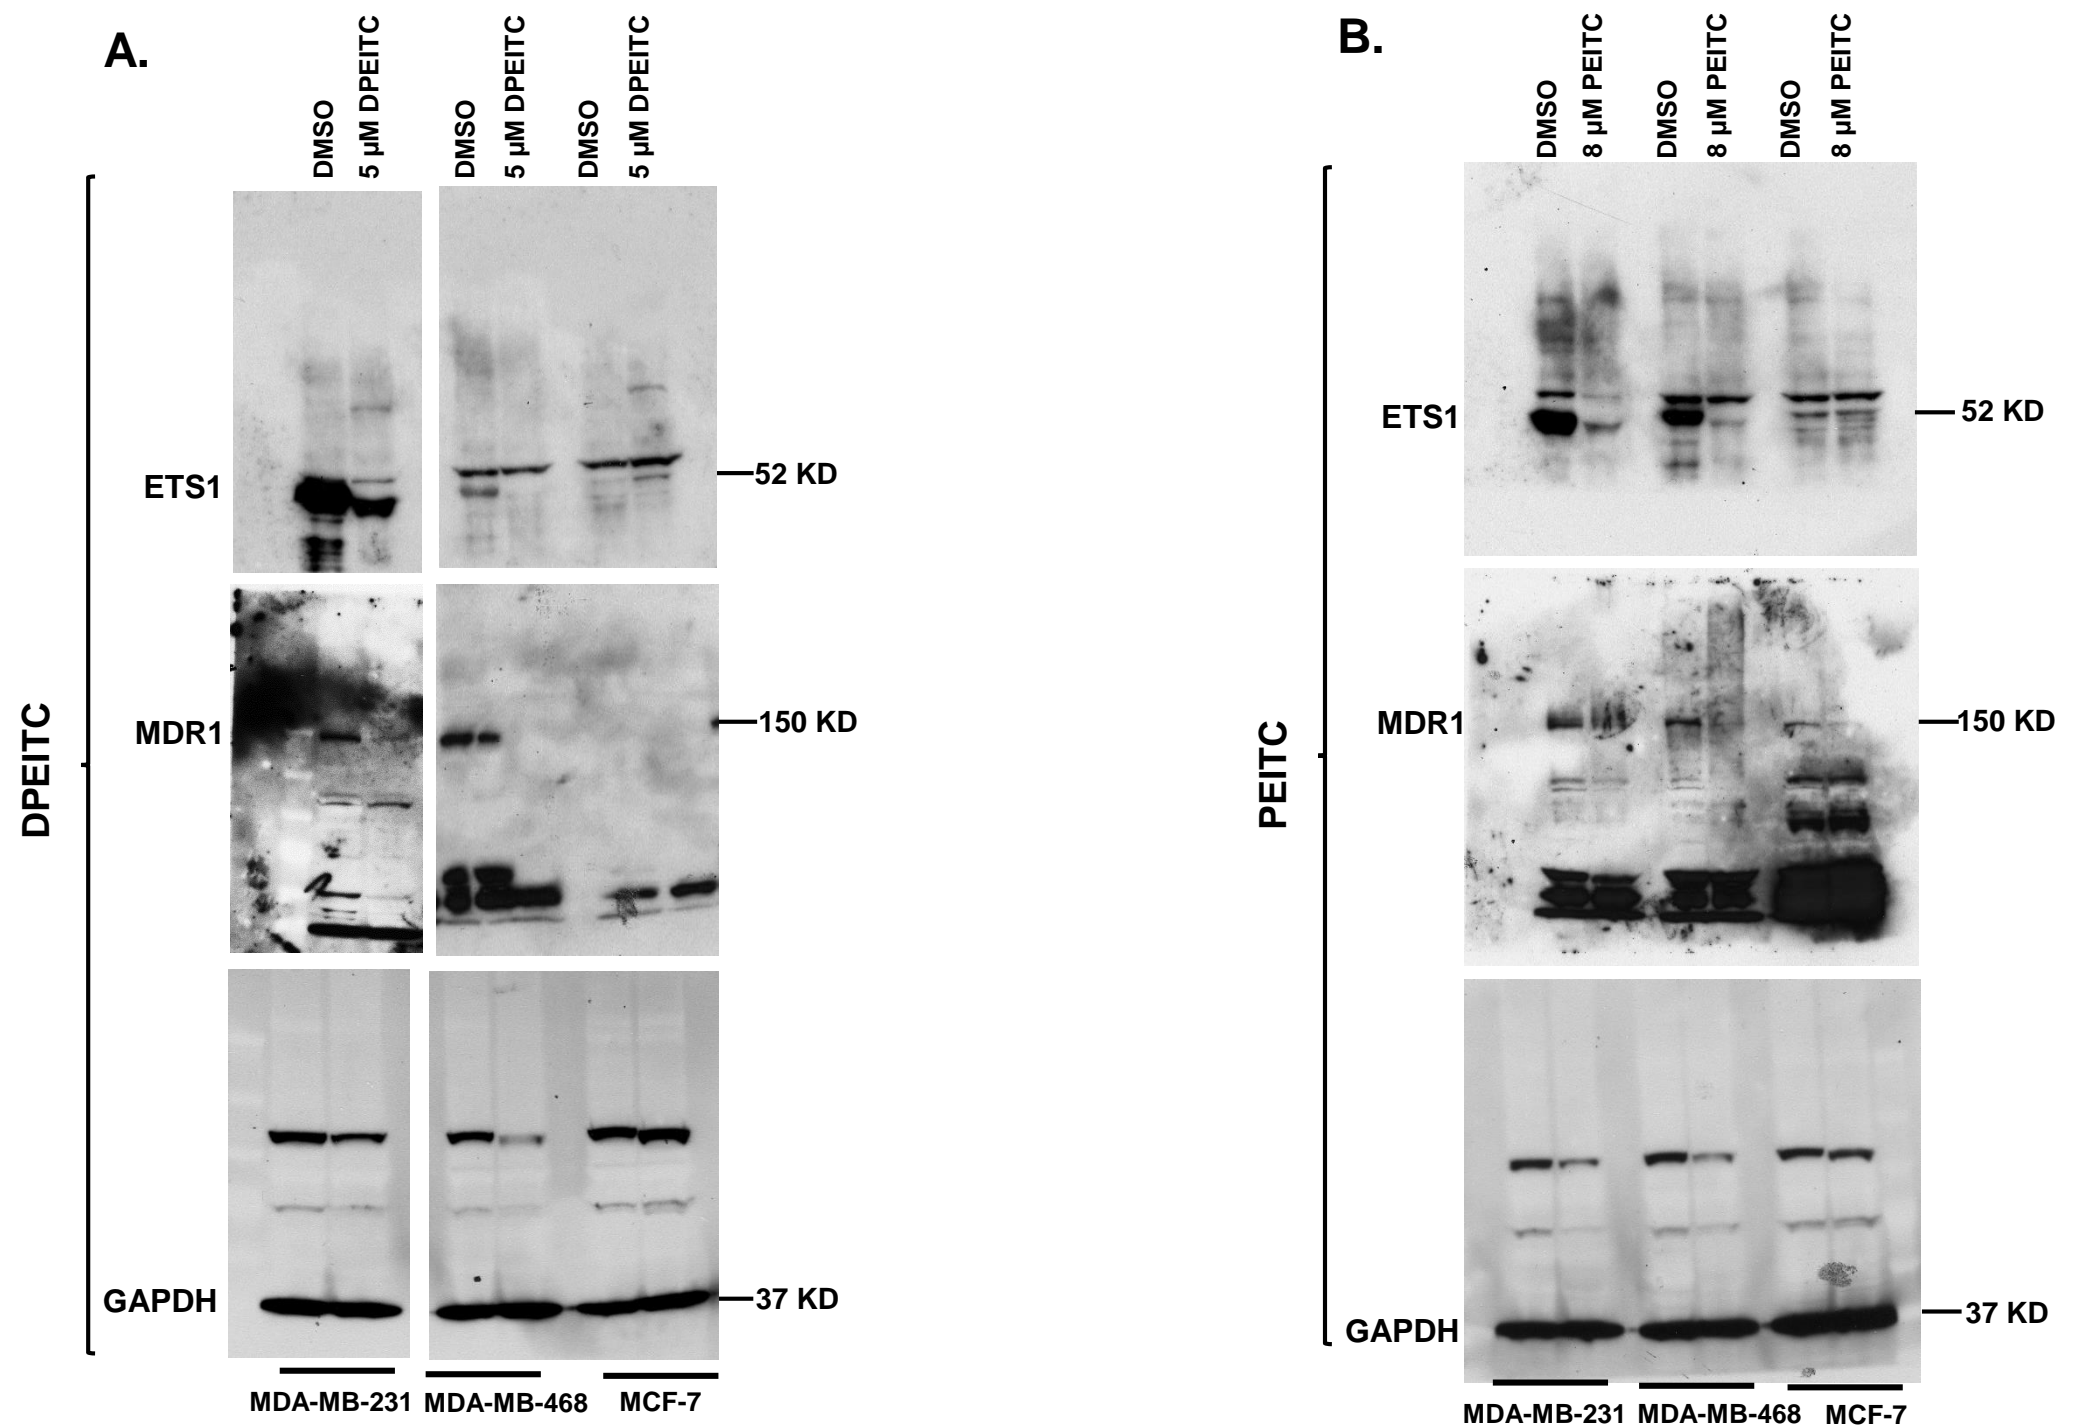

**Figure 9**

**A.**

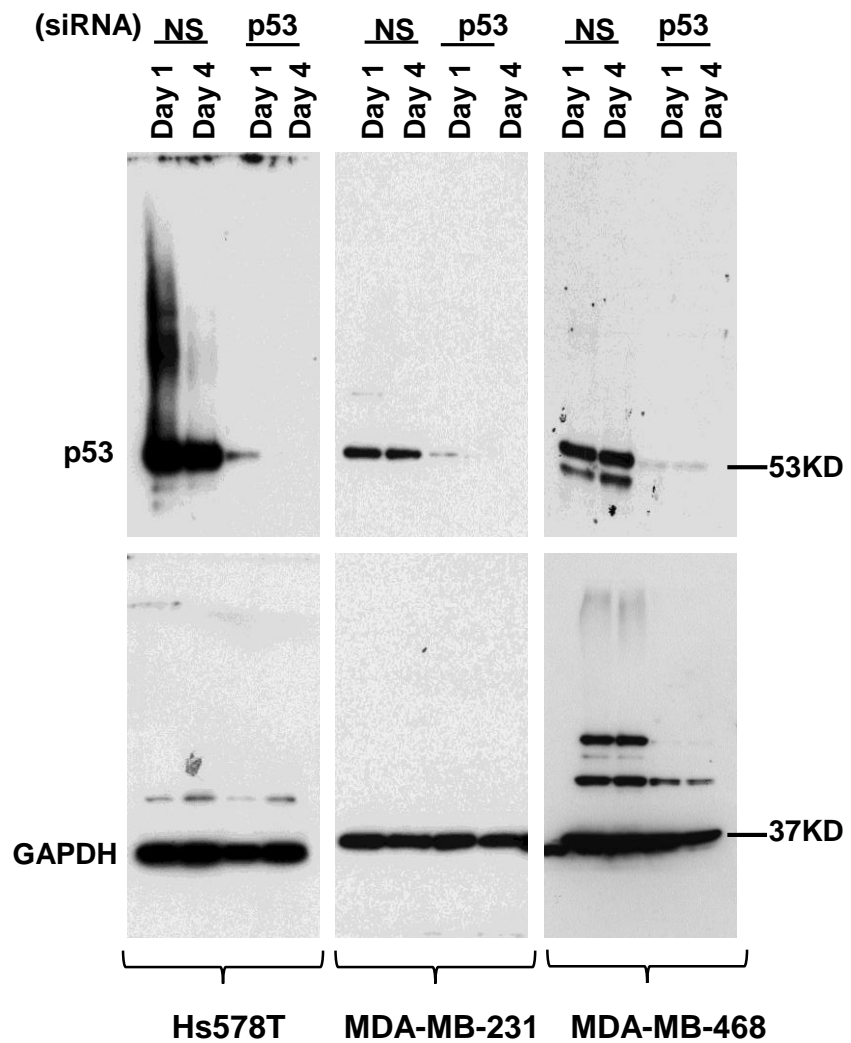

Supplementary Figure S3



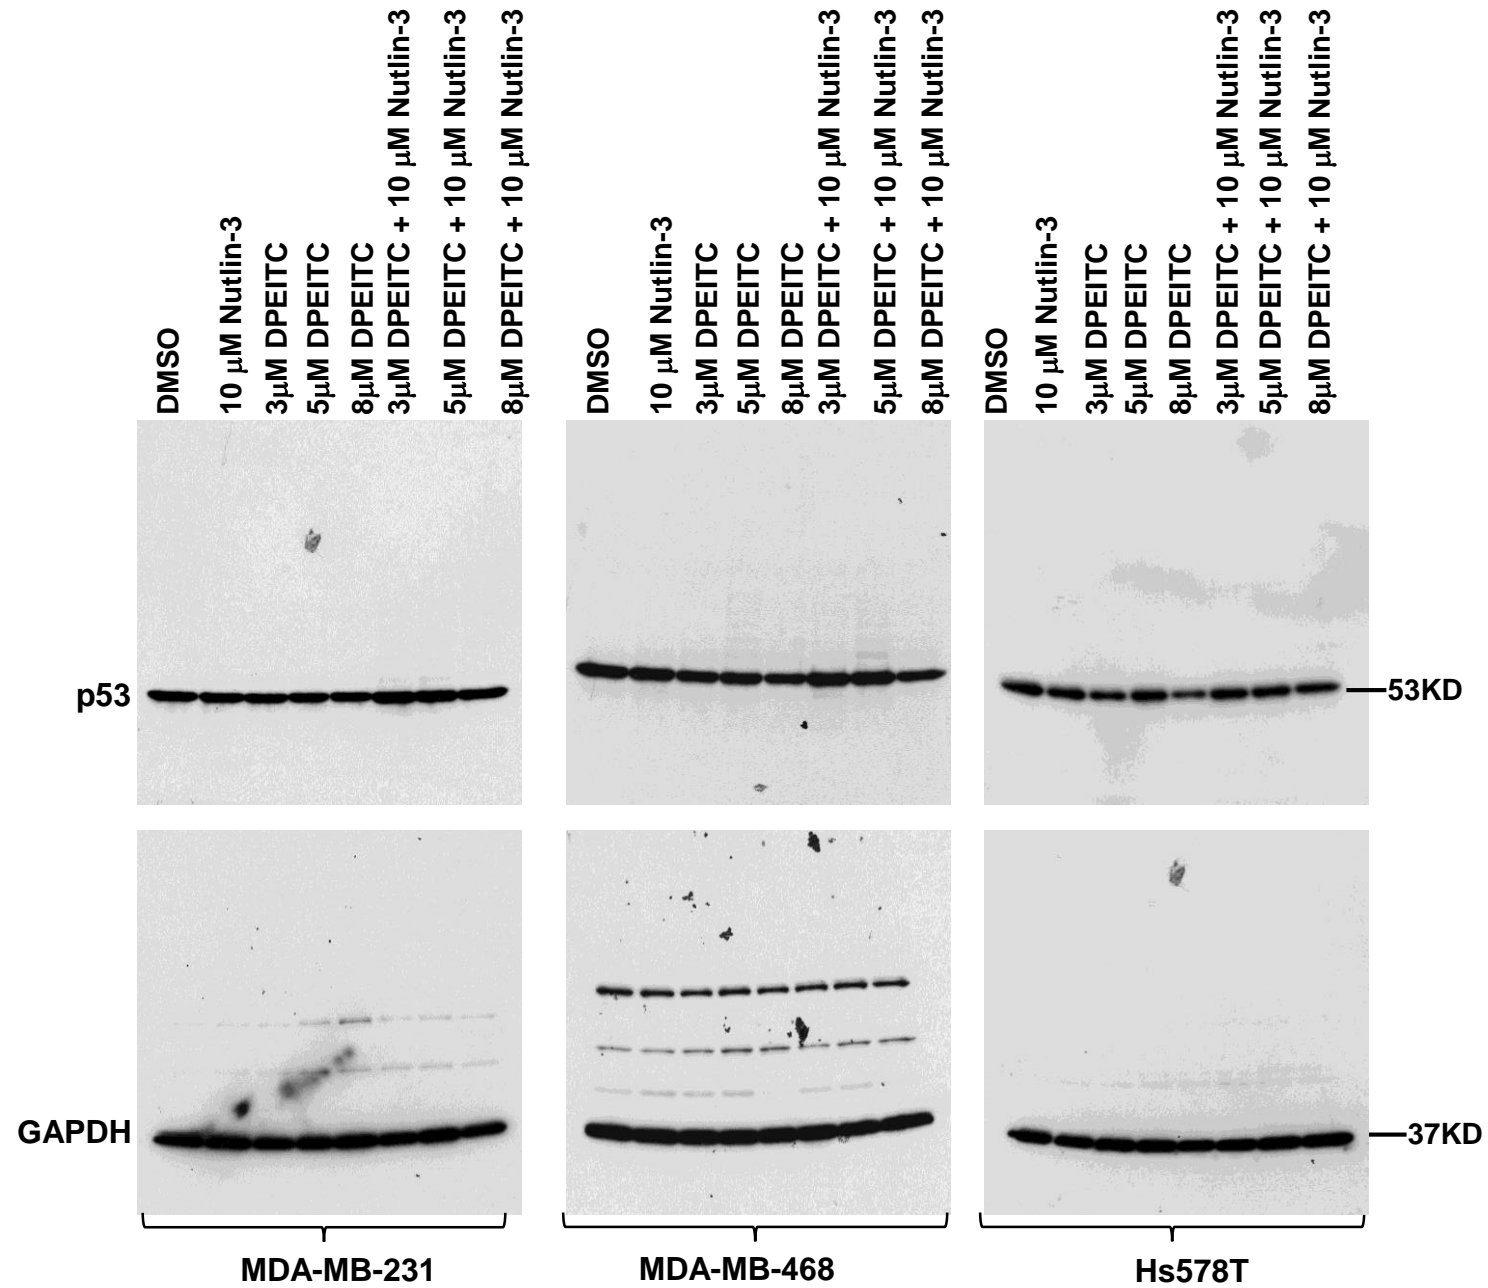

Supplementary Figure S4

**C.**

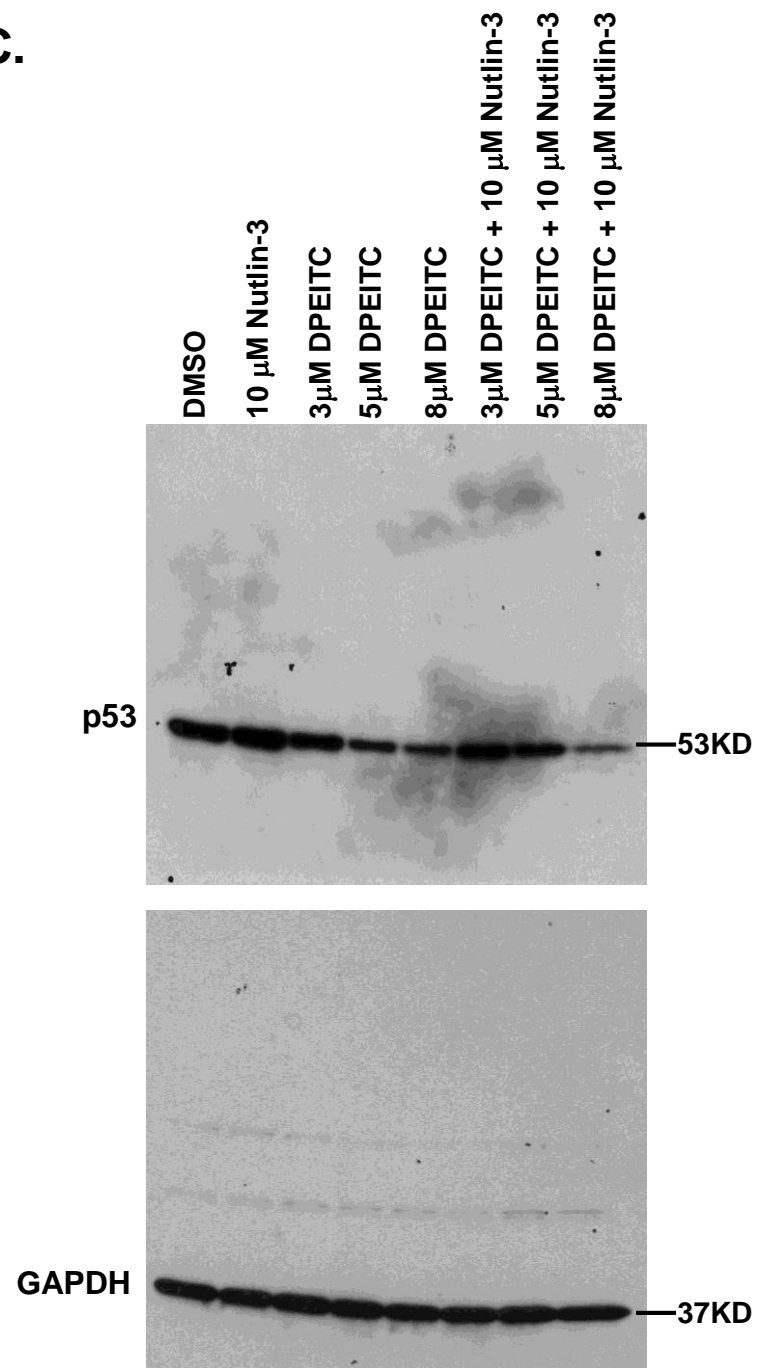

**Supplementary Figure S7**
